# Supplementary material for: Liver fibrosis and its response to avapritinib in 2 patients with systemic mastocytosis
Source: PubMed Central journal article supplement — Blood Adv. 2022 Jul 19;6(20):5630–3. doi: 10.1182/bloodadvances.2022008038 (PMC9647789; doi:10.1182/bloodadvances.2022008038), 2022-07-19

**Supplemental Table 1. Some LFTs Before and 15 Months After Treatment of Avapritinib in Patients with Systemic Mastocytosis**

| Case | Age/<br>Sex | Bone Marrow Mast Cells (%) |      | Spleen (cm) |      | Liver (cm) |      | Total Bilirubin (mg/dL) |      | ALP (U/L) |      | ALT (U/L) |      | GGT (U/L) |      | Albumin (g/dL) |      | T.Protein (g/dL) |      |
|------|-------------|----------------------------|------|-------------|------|------------|------|-------------------------|------|-----------|------|-----------|------|-----------|------|----------------|------|------------------|------|
|      |             | Pre                        | Post | Pre         | Post | Pre        | Post | Pre                     | Post | Pre       | Post | Pre       | Post | Pre       | Post | Pre            | Post | Pre              | Post |
| 1    | 63/F        | 70                         | 5    | 24          | 19   | 24         | 19   | 1.4                     | 3.1* | 140       | 62   | 16        | 15   | 30        | 10   | 3.6            | 4.3  | 7.3              | 7.0  |
| 2    | 39/M        | 50                         | 5    | 29          | 18   | 28         | 25   | 0.4                     | 0.7  | 106       | 100  | 9         | 42   | 35        | 56   | 4.2            | 4.5  | 7.6              | 8.1  |

\* mostly indirect, direct bilirubin was 0.4

**Abbreviations:** ALT, alanine aminotransferase; AST, aspartate transferase; ALP, alkaline phosphatase; GGT, gamma-glutamyl transferase.

**Supplemental Figure 1:  
A) Tryptase Levels**

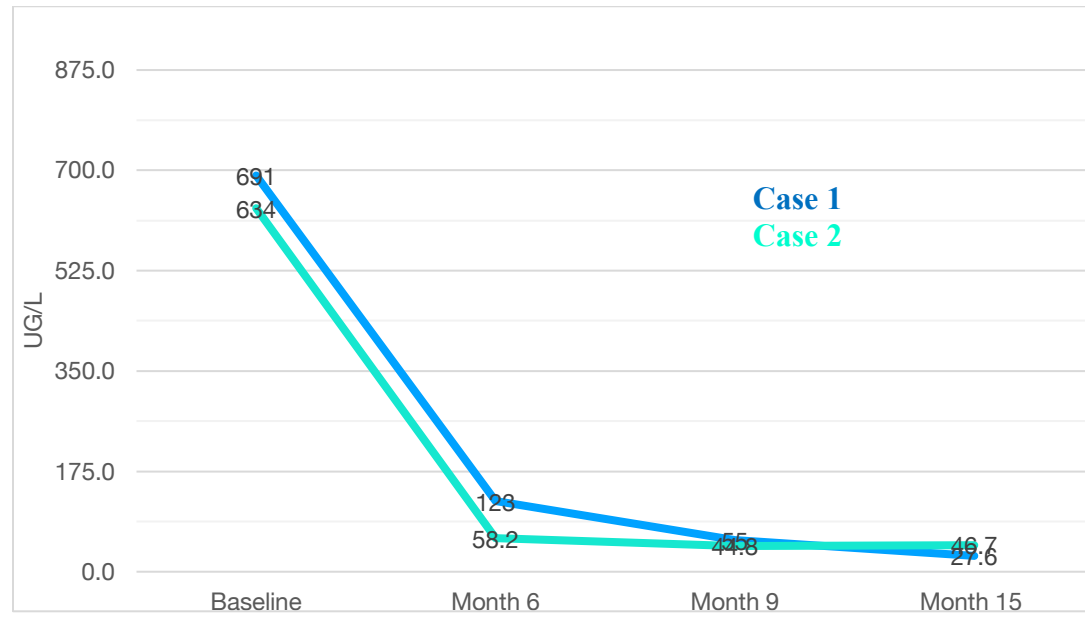

**B) Liver Stiffness by MRE**

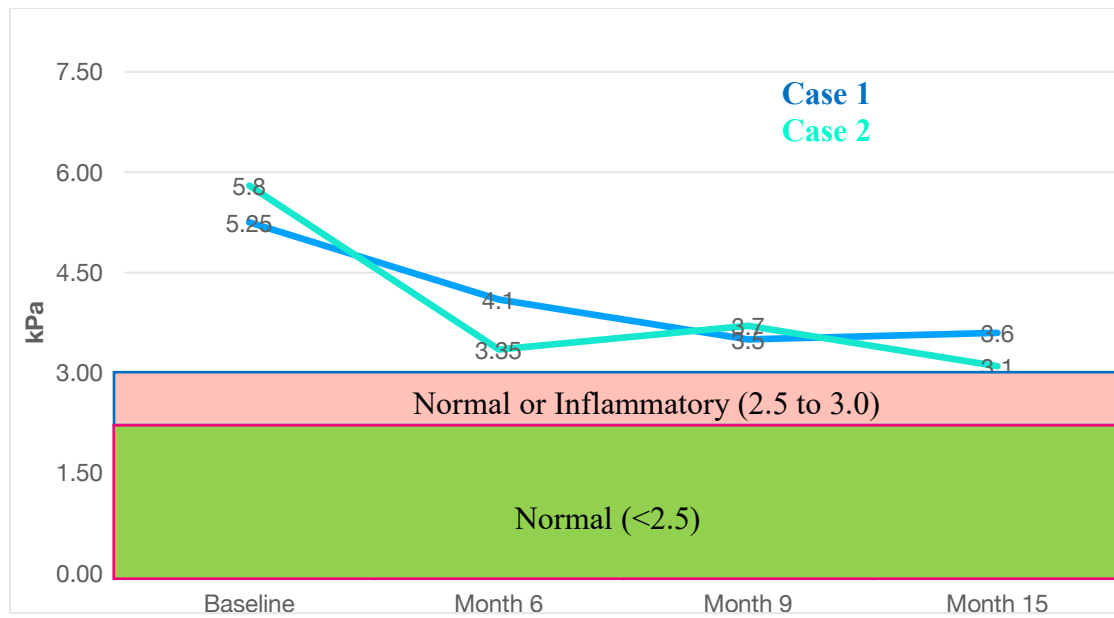

Supplement: BLOODA_ADV-2022-008038-mmc1.pdf [file BLOODA_ADV-2022-008038-mmc1.pdf]
